# Supplementary material
Source: publisher figshare collection journal article supplement (https://acs.figshare.com/ndownloader/files/8749399)
Supplement: Supplementary file 1 [file 8749399]

## **Supporting Information**

### **Chiral Discrimination of Diamines by a Binaphthalene Bridged Porphyrin dimer**

**Wenxin Lu, Huifang Yang, Xinyao Li, Chiming Wang, Xiaopeng Zhan,**

**Dongdong Qi, Yongzhong Bian and Jianzhuang Jiang**

*Beijing Key Laboratory for Science and Application of Functional Molecular and  
Crystalline Materials, Department of Chemistry, University of Science and  
Technology Beijing, Beijing 100083, China*

## Content

1. Chemicals and instruments, page S3.
2. Synthetic scheme and characterization, pages S4-S7.
3. UV-Vis spectrophotometric titration, pages S8-S13.
4. CD titration, pages S14 and S15.
5. Molecular modeling, pages S16 and S17.
6.  $^1\text{H}$  NMR titration, pages S18-S25.
7. CD data of (*S*)-**H1** with chiral 1,2-diamines, page S26.
8. Selected structural parameters from the DFT-optimized structures, page S27.
9. The  $^1\text{H}$  NMR chemical shift data of free and bound (*R*)-/(*S*)-PPDA and (*R*)-/(*S*)-DPEA in the presence of (*S*)-**H1** in  $\text{CDCl}_3$  at 298 K, pages S28 and S29.
10. Reference, page S30.

## Chemicals and Instruments

Column chromatography was carried out on silica gel (200-300 mesh, Qingdao Ocean Chemicals) with the indicated eluent. Toluene and N,N-dimethylformamide (DMF) were freshly distilled from  $\text{CaH}_2$  under nitrogen. 5-(4-hydroxyphenyl)-10,15,20-tris(4-*tert*-butylphenyl)porphyrin (Zn(TTBPP))<sup>[S1]</sup> was prepared according to the published procedures. All other reagents and solvents were used as received.

$^1\text{H}$  NMR spectra were recorded on a Bruker DPX 400 spectrometer (400 MHz) in  $\text{CDCl}_3$  and the chemical shifts were reported relative to internal  $\text{SiMe}_4$ . MALDI-TOF mass spectra were taken on a Bruker Microflex<sup>TM</sup> LRF spectrometer with dithranol as the matrix. Elemental analyses were performed on an Elementar Vavio El III elemental analyzer. Electronic absorption spectra were recorded on a Lambda 750 spectrophotometer. CD spectra were recorded on a JASCO J-1500 spectropolarimeter.

Synthetic scheme of (*R*)-/(*S*)-H1.

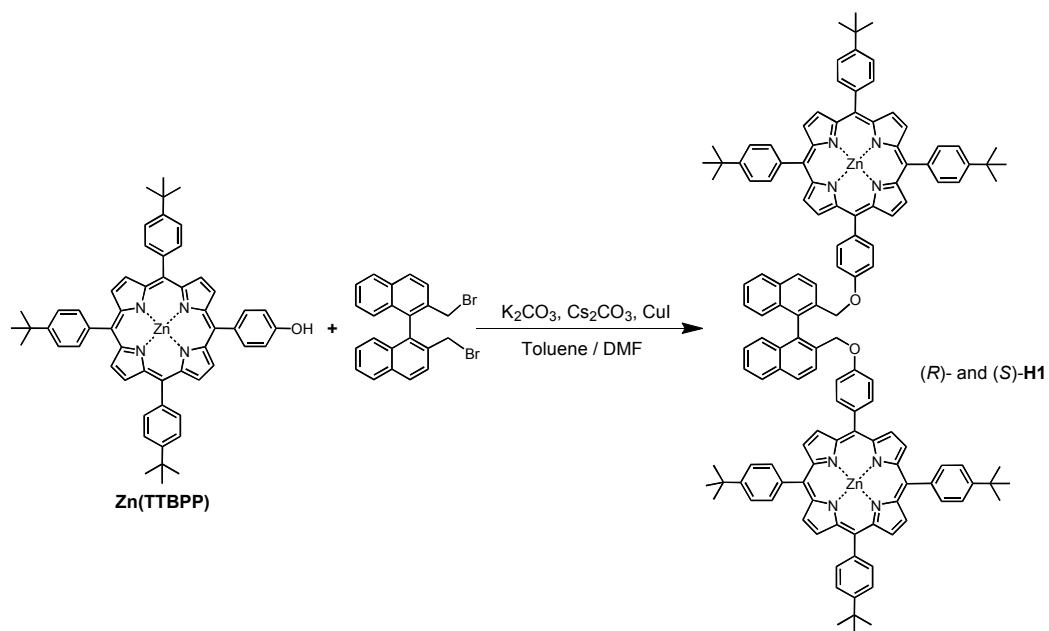

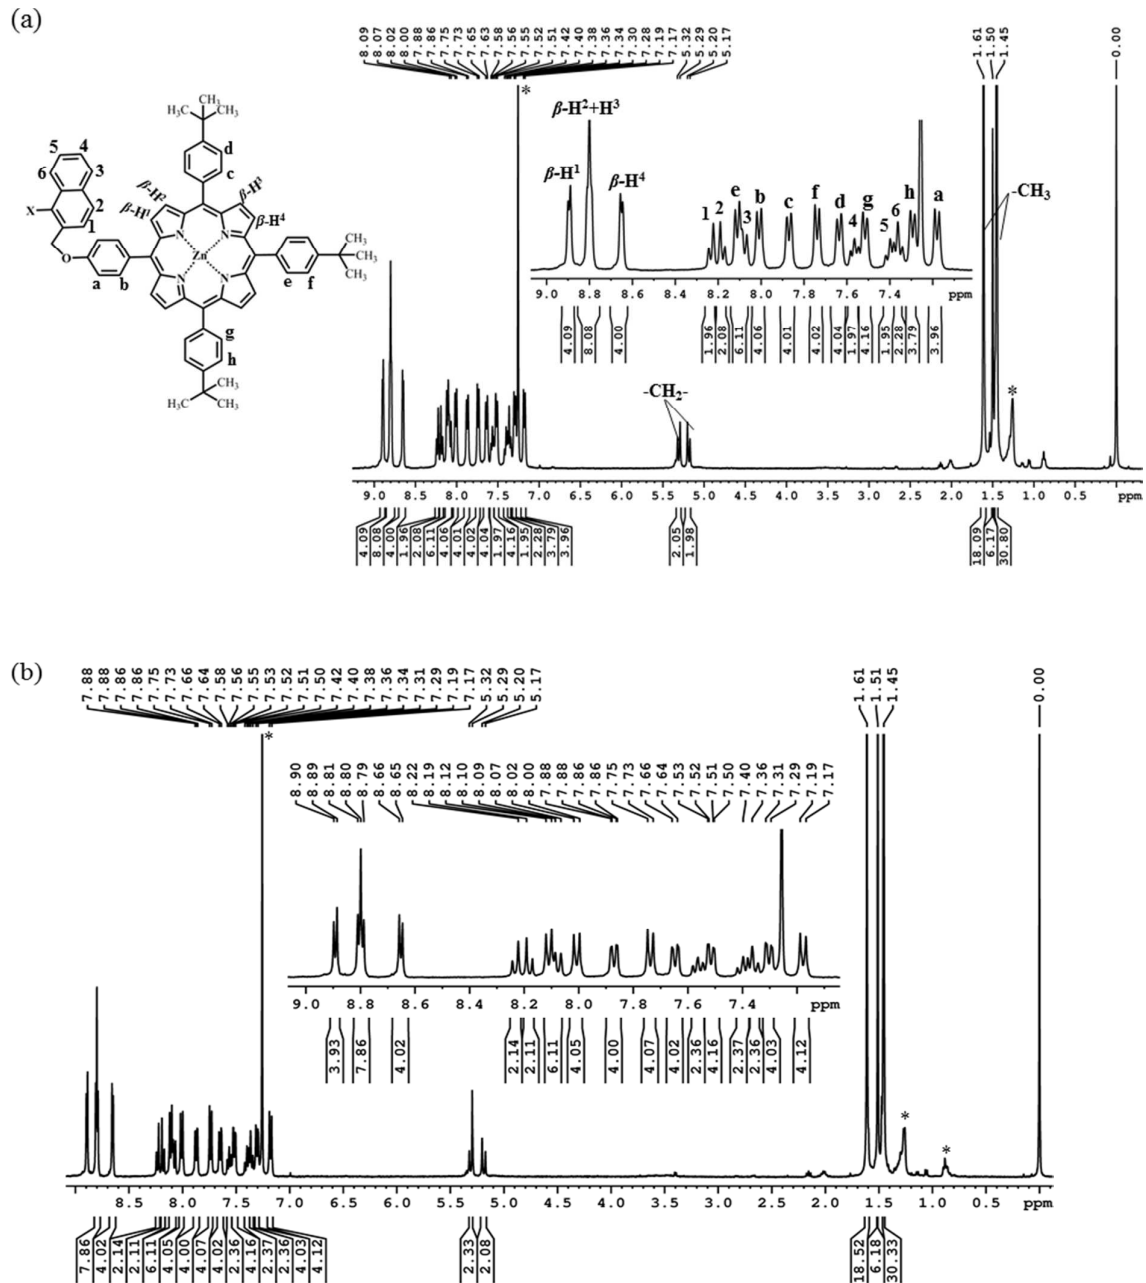

**Figure S1.**  $^1\text{H}$  NMR spectrum of (a) (*R*)-**H1** and (b) (*S*)-**H1** in  $\text{CDCl}_3$  at 293 K. \*

indicate the residual solvent signals.

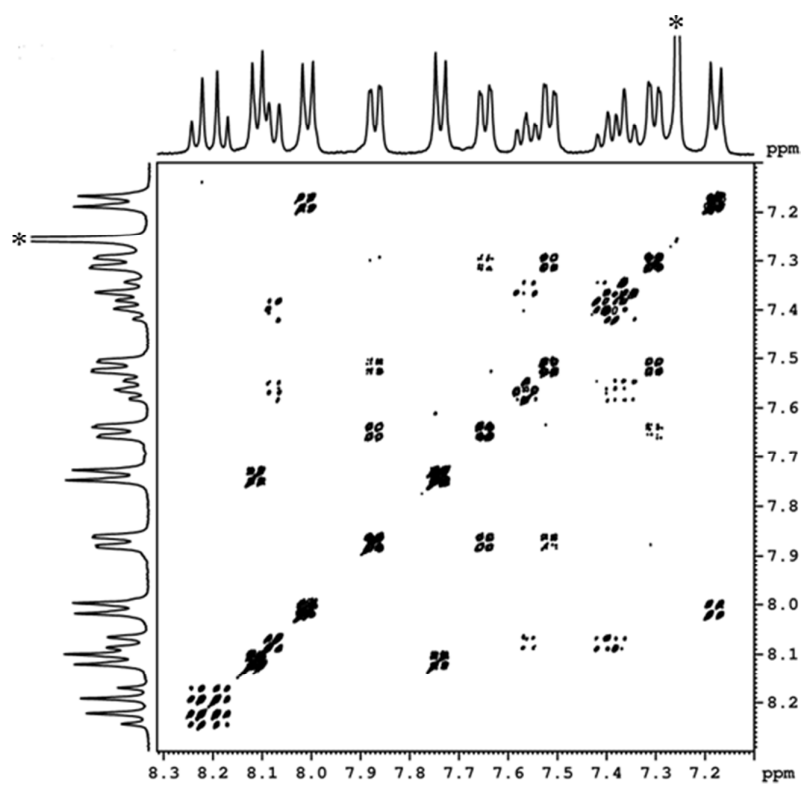

**Figure S2.**  $^1\text{H}$ - $^1\text{H}$  COSY spectra of (*S*)-**H1** in  $\text{CDCl}_3$  at 293 K. \* indicate the residual solvent signals.

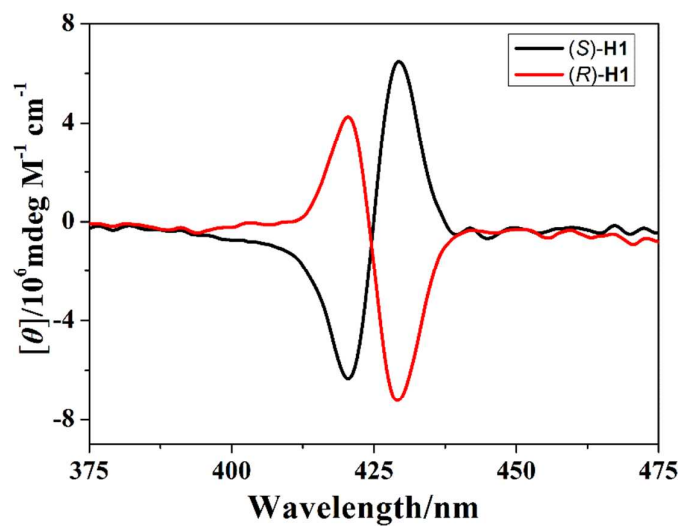

**Figure S3.** CD spectra of (*S*)-**H1** (black) and (*R*)-**H1** (red) in CHCl<sub>3</sub> at 298 K.

## UV-Vis Spectrophotometric Titration.

### Method for Evaluation of Association Constants ( $K_{assoc}$ )

The association constant  $K_{assoc}$  for the 1:1 complexes was derived by using the non-linear curve fitting based on the equation:

$$\Delta Abs = (A_{\infty}(1+K_{assoc}[G]+K_{assoc}[H]) - (A_{\infty}^2(K_{assoc}[G]+K_{assoc}[H]+1)^2 - 4K_{assoc}^2[H]*[G] A_{\infty}^2)^{0.5})/2K_{assoc}[H]$$

Where [G] and [H] represent  $[Guest]_{total}$  and  $[Host]_{total}$ , respectively;  $A_{\infty}$  denotes  $\Delta Abs$  at 100% complexation;  $A_{\infty}$  and  $K_{assoc}$  are parameters. <sup>[S2]</sup>

For the 1:2 complexes, the apparent association constant  $K_{assoc}$  was evaluated from the same equation, but  $[H] = 2*[Host]_{total}$ . <sup>[S2]</sup>



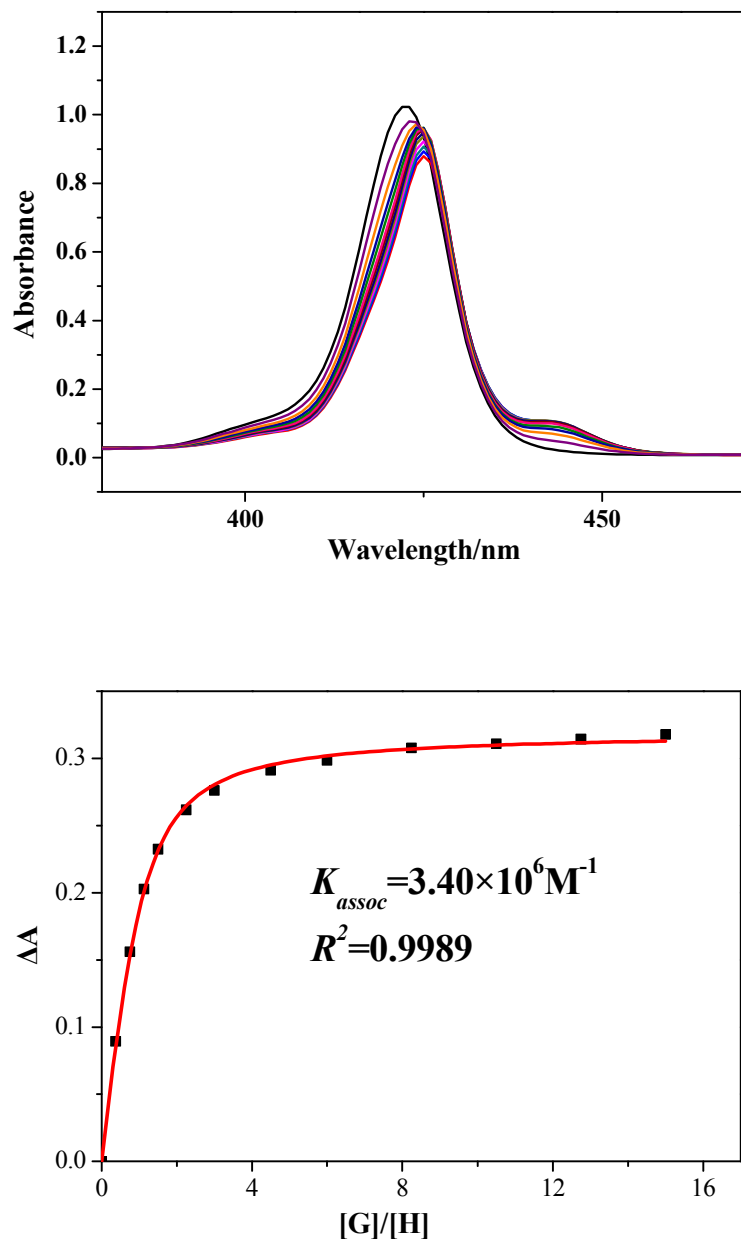

**Figure S4.** (a) Spectral change upon titration of (*R*)-**H1** with (*S*)-DACH in  $\text{CHCl}_3$  at 298 K. (b) Changes in  $\Delta A$  at 420 nm for evaluating  $K_{\text{assoc}}$ , the solid line represents the non-linear least square fit for 1:1 complexation.  $[(R)\text{-H1}] = 1.0 \times 10^{-6} \text{ M}$ ; (*S*)-DACH /  $[(R)\text{-H1}] = 0\text{--}15$ .

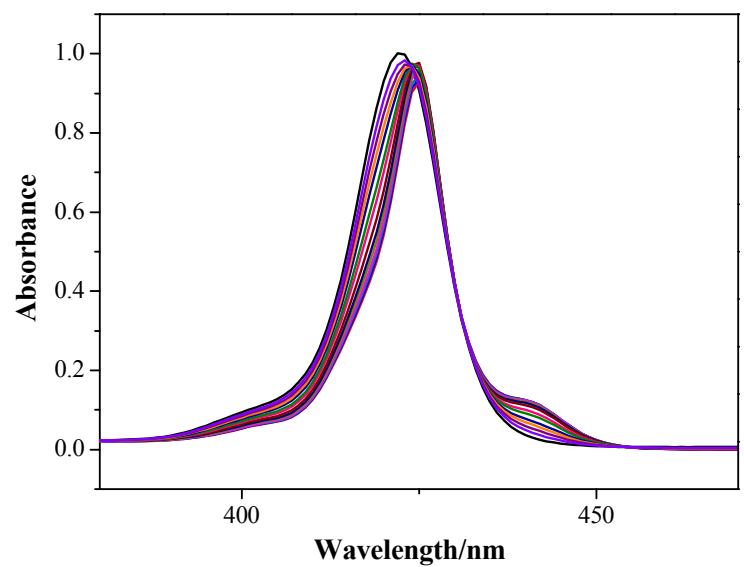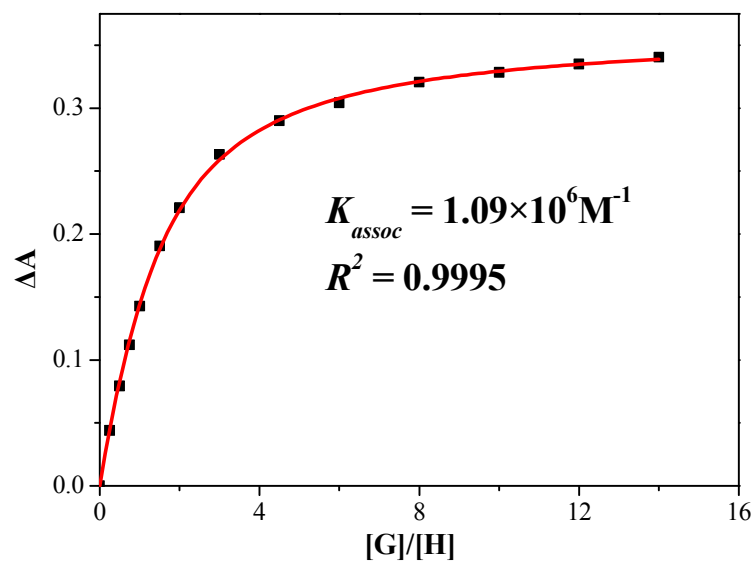

**Figure S5.** (a) Spectral change upon titration of (*R*)-**H1** with (*R*)-PPDA in CHCl<sub>3</sub> at 298 K. (b) Changes in  $\Delta A$  at 420 nm for evaluating  $K_{\text{assoc}}$ , the solid line represents the non-linear least square fit for 1:1 complexation.  $[(R)\text{-H1}] = 1.0 \times 10^{-6}$  M; (*R*)-PPDA/ $[(R)\text{-H1}] = 0\text{--}15$ .

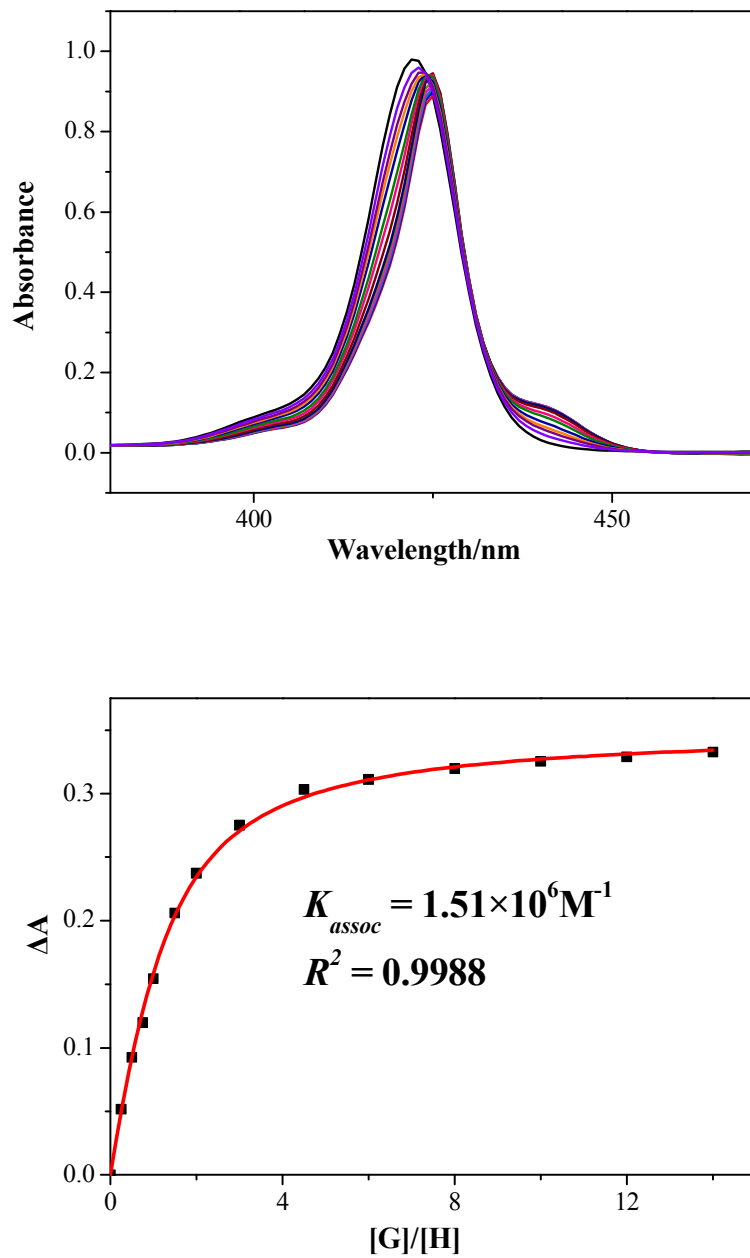

**Figure S6.** (a) Spectral change upon titration of (*R*)-**H1** with (*S*)-PPDA in CHCl<sub>3</sub> at 298 K. (b) Changes in  $\Delta A$  at 420 nm for evaluating  $K_{assoc}$ , the solid line represents the non-linear least square fit for 1:1 complexation.  $[(R)\text{-H1}] = 1.0 \times 10^{-6} \text{ M}$ ; (*S*)-PPDA/ $[(R)\text{-H1}] = 0\text{--}15$ .

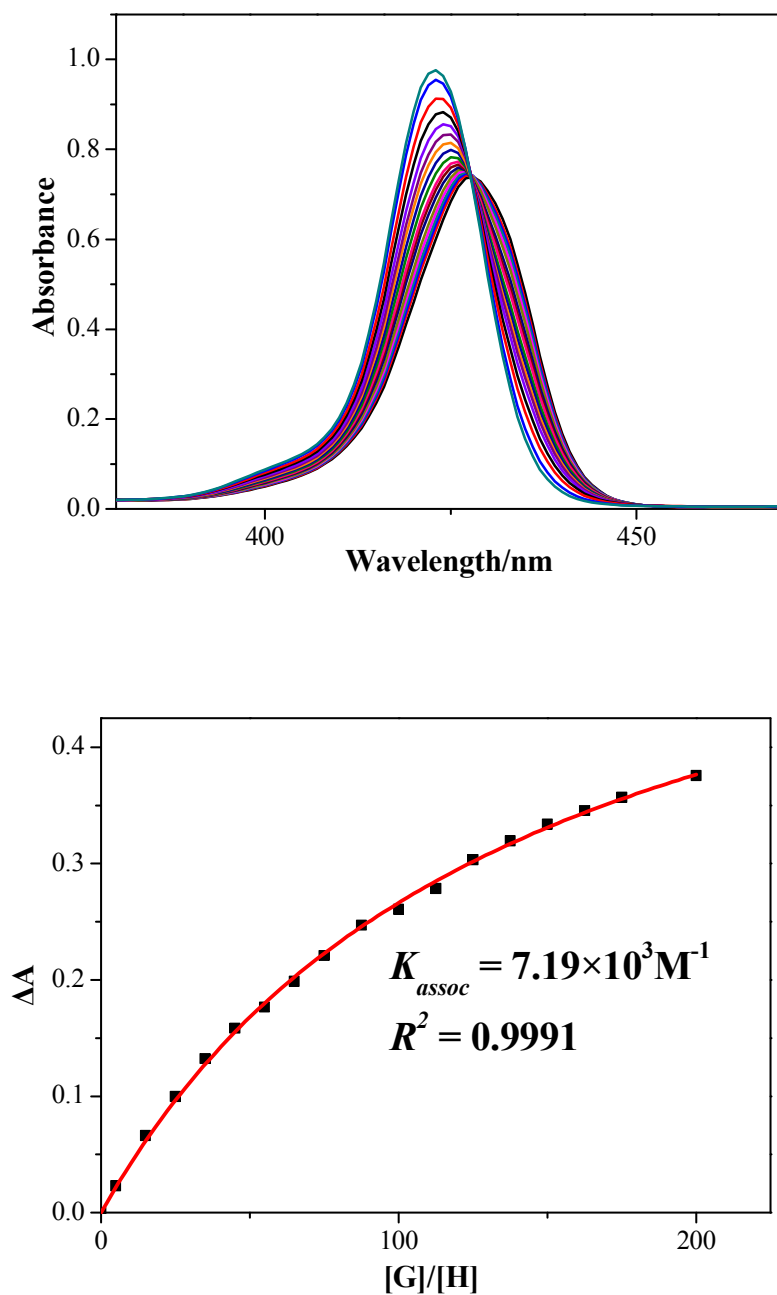

**Figure S7.** (a) Spectral change upon titration of (R)-**H1** with (R)-DPEA in  $\text{CHCl}_3$  at 298 K. (b) Changes in  $\Delta A$  at 420 nm for evaluating  $K_{\text{assoc}}$ , the solid line represents the non-linear least square fit for 1:2 complexation.  $[(R)\text{-H1}] = 1.0 \times 10^{-6} \text{ M}$ ; (R)-DPEA/ $[(R)\text{-H1}] = 0\text{--}200$ .

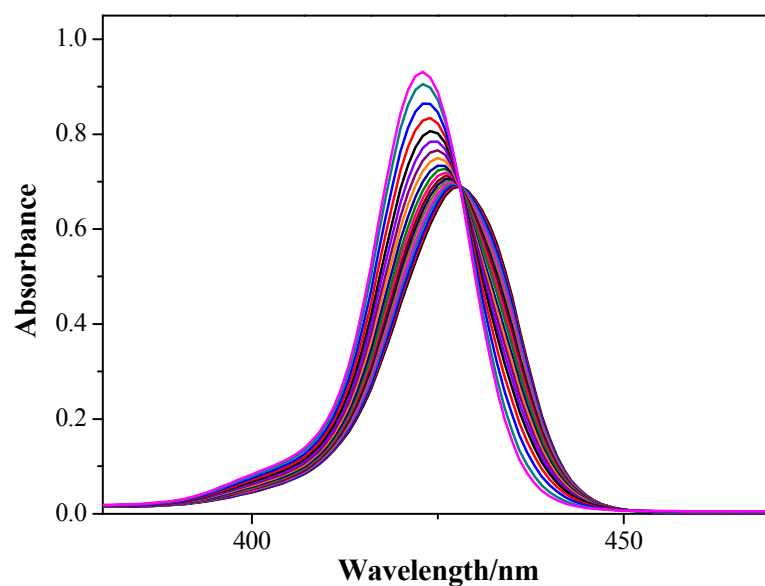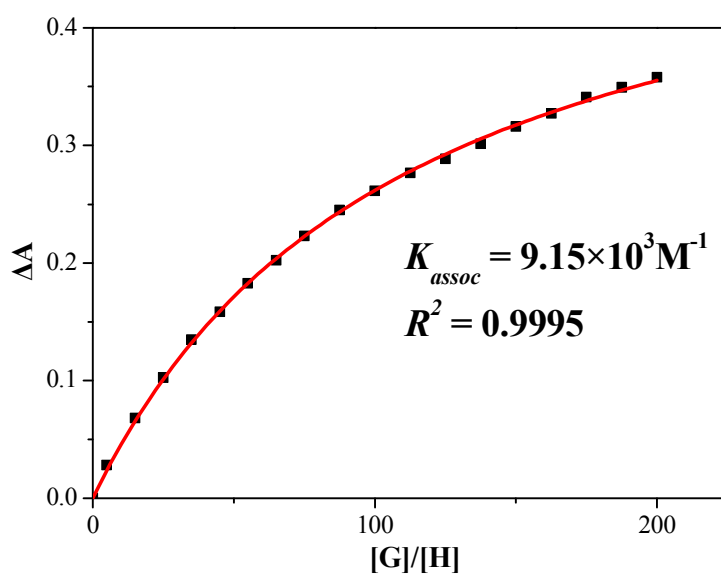

**Figure S8.** (a) Spectral change upon titration of (*R*)-**H1** with (*S*)-DPEA in CHCl<sub>3</sub> at 298 K. (b) Changes in  $\Delta A$  at 420 nm for evaluating  $K_{\text{assoc}}$ , the solid line represents the non-linear least square fit for 1:2 complexation.  $[(R)\text{-H1}] = 1.0 \times 10^{-6} \text{ M}$ ; (*S*)-DPEA/ $[(R)\text{-H1}] = 0\text{--}200$ .

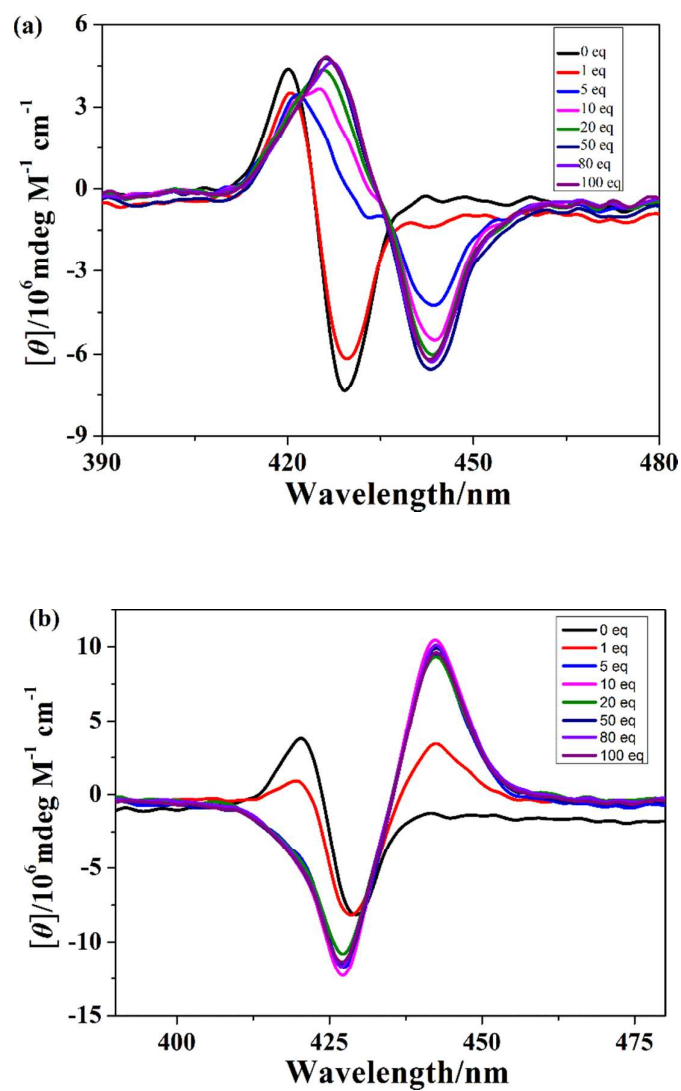

**Figure S9.** CD spectral change upon titration of (*R*)-**H1** with (*R*)-DACH (a) and (*S*)-DACH (b) in  $\text{CHCl}_3$  at 298 K,  $[(R)\text{-H1}] = 1.0 \times 10^{-6} \text{ M}$ ;  $\text{DACH}/[(R)\text{-H1}] = 0\text{--}100$ .

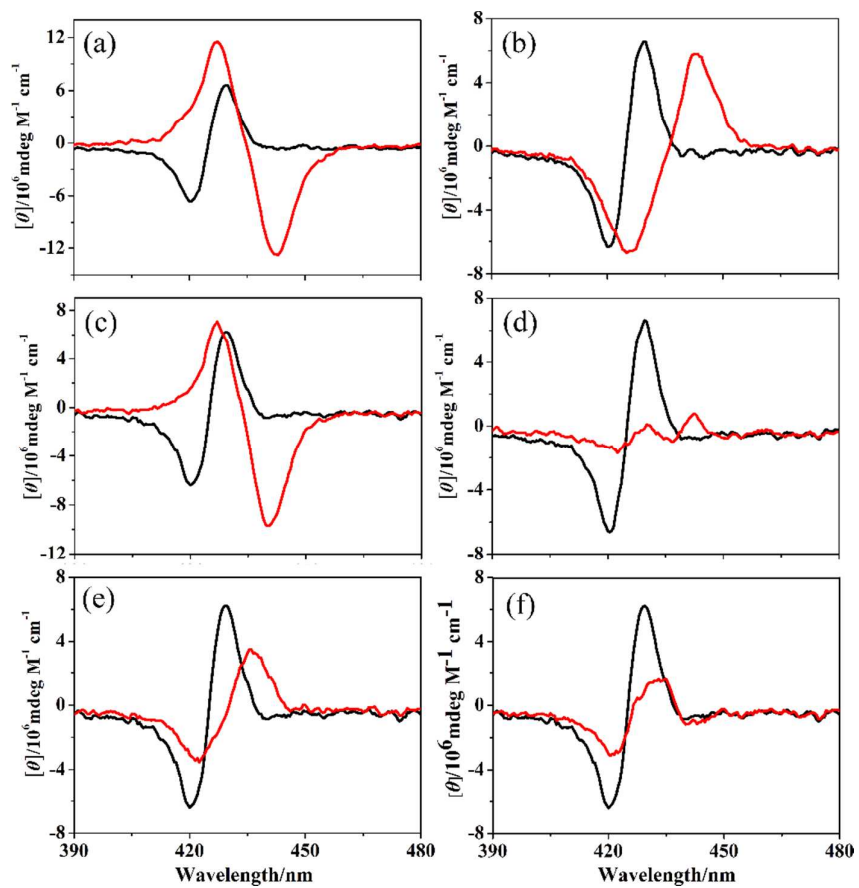

**Figure S10.** CD spectra of (*S*)-**H1** before (black) and after (red) the addition of: (a) (*R*)-DACH (20 equiv), (b) (*S*)-DACH (20 equiv), (c) (*R*)-PPDA (20 equiv), (d) (*S*)-PPDA (20 equiv), (e) (*R*)-DPEA (200 equiv), and (f) (*S*)-DPEA (200 equiv).

**Computational details:** DFT calculations on the optimization of geometric molecular structures were performed at DFT method at the B97D/6-31G(D) level using Gaussian 09 (*Version D.01*) program.<sup>[S3]</sup> The torsion angle ( $\Phi$ ) between the two chromophores is the spatial angel of C15-C5-C5'-C15'. The interchromophoric distance is the distance of Zn-Zn.

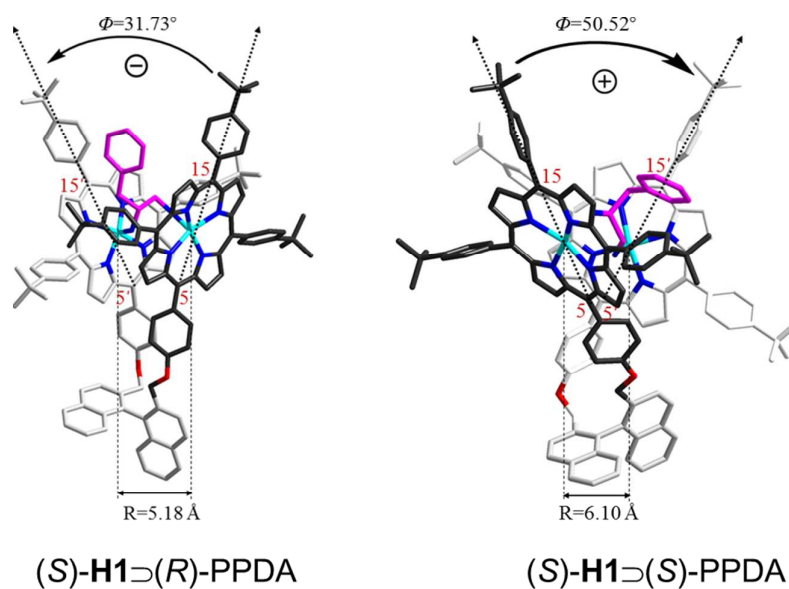

**Figure S11.** Optimized molecular structures of (S)-H1⊃(R)-PPDA and (S)-H1⊃(S)-PPDA by DFT method at the B97D/6-31G(D) level. The torsion angle  $\Phi$  is the spatial angel of C15-C5-C5'-C15'; the interchromophoric distance is the Zn-Zn distance in Å.



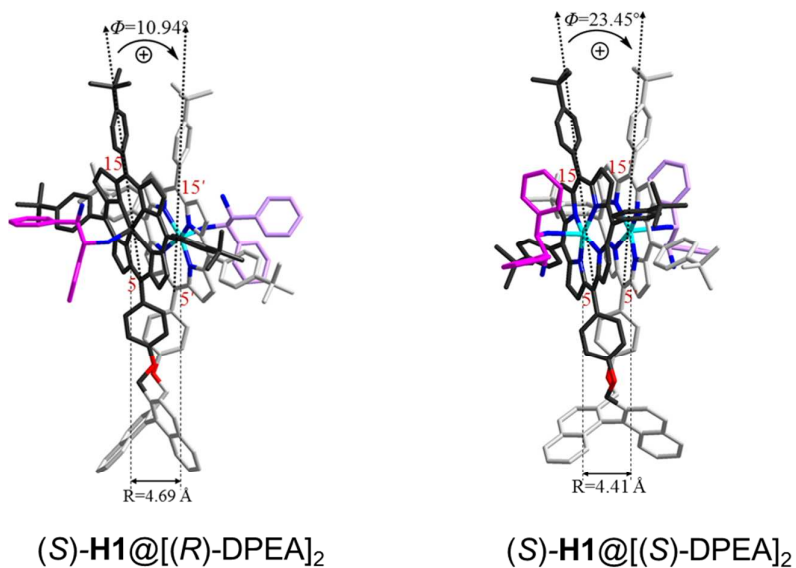

**Figure S12.** Optimized molecular structures of  $(S)\text{-H1}@[(R)\text{-DPEA}]_2$  and  $(S)\text{-H1}@[(S)\text{-DPEA}]_2$  by DFT method at the B97D/6-31G(D) level. The torsion angle  $\Phi$  is the spatial angel of C15-C5- C5'-C15'; the interchromophoric distance is the Zn-Zn distance in  $\text{\AA}$ .

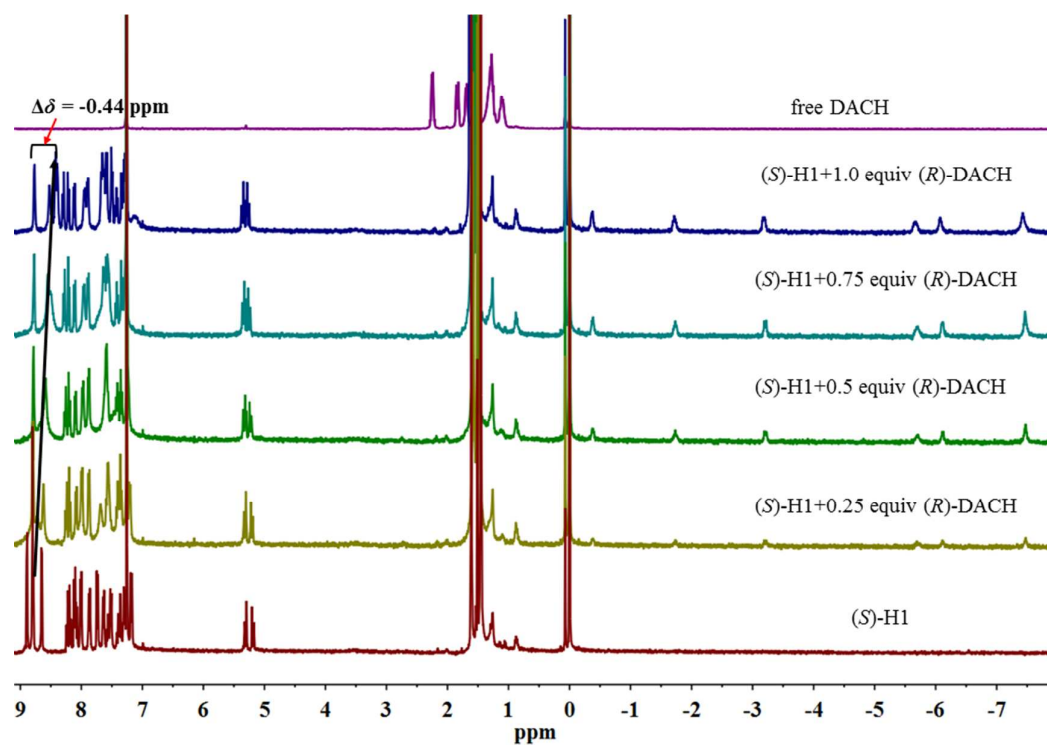

**Figure S13.**  $^1\text{H}$  NMR titration spectra of (*S*)-**H1** (0.75 mM) with (*R*)-DACH (0.0-1.0 equiv, 0.25 equiv additions) at 298 K in  $\text{CDCl}_3$ .

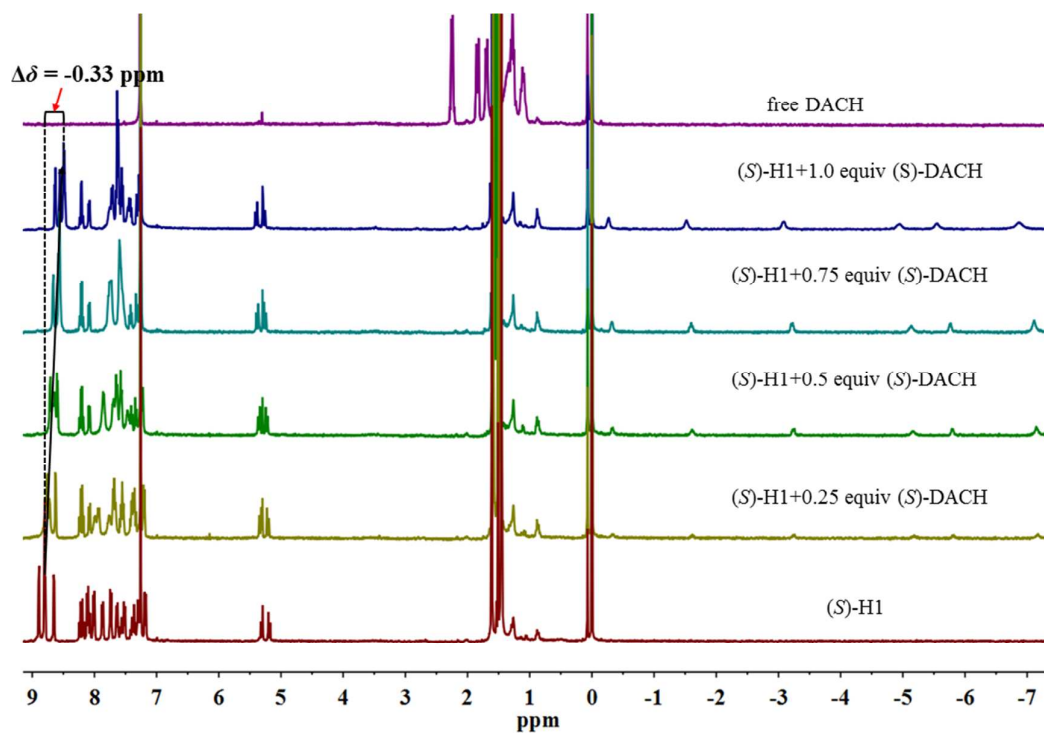

**Figure S14.** <sup>1</sup>H NMR titration spectra of (S)-H1 (0.75 mM) with (S)-DACH (0.0-1.0 equiv, 0.25 equiv additions) at 298 K in CDCl<sub>3</sub>.

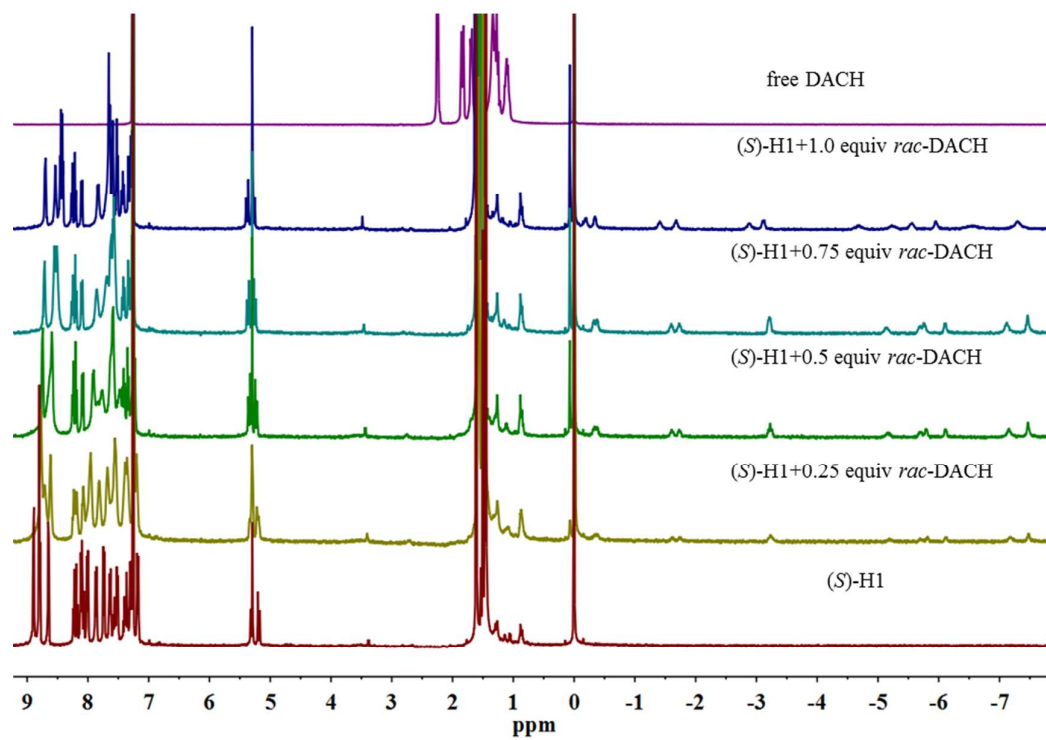

**Figure S15.** <sup>1</sup>H NMR titration spectra of (S)-H1 (0.75 mM) with *rac*-DACH (0.0-1.0 equiv, 0.25 equiv additions) at 298 K in CDCl<sub>3</sub>.

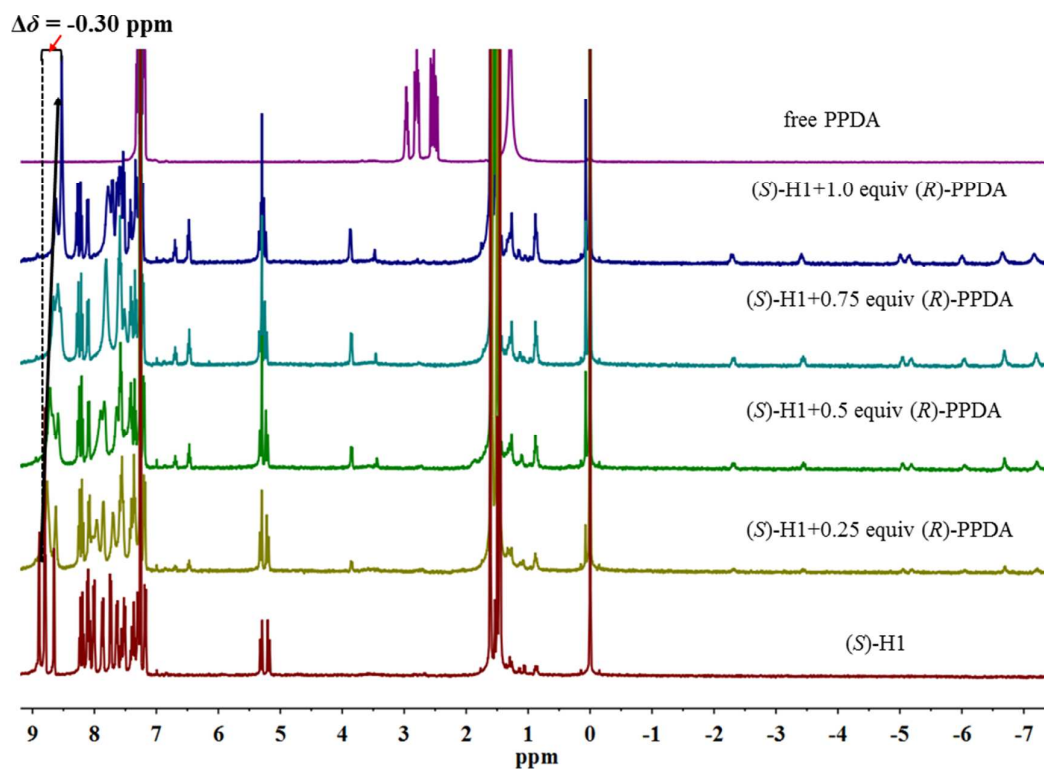

**Figure S16.**  $^1\text{H}$  NMR titration spectra of (S)-H1 (0.75mM) with (R)-PPDA (0.0-1.0 equiv, 0.25 equiv additions) at 298 K in  $\text{CDCl}_3$ .

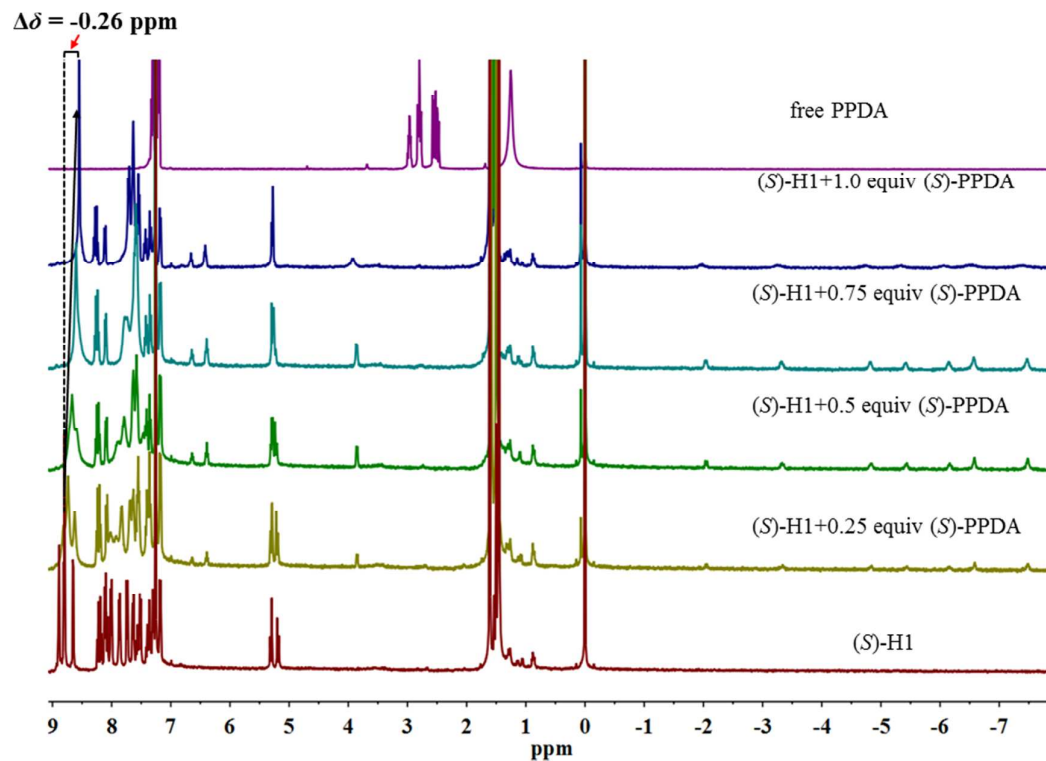

**Figure S17.**  $^1\text{H}$  NMR titration spectra of (S)-H1 (0.75 mM) with (S)-PPDA (0.0-1.0 equiv, 0.25 equiv additions) at 298 K in  $\text{CDCl}_3$ .

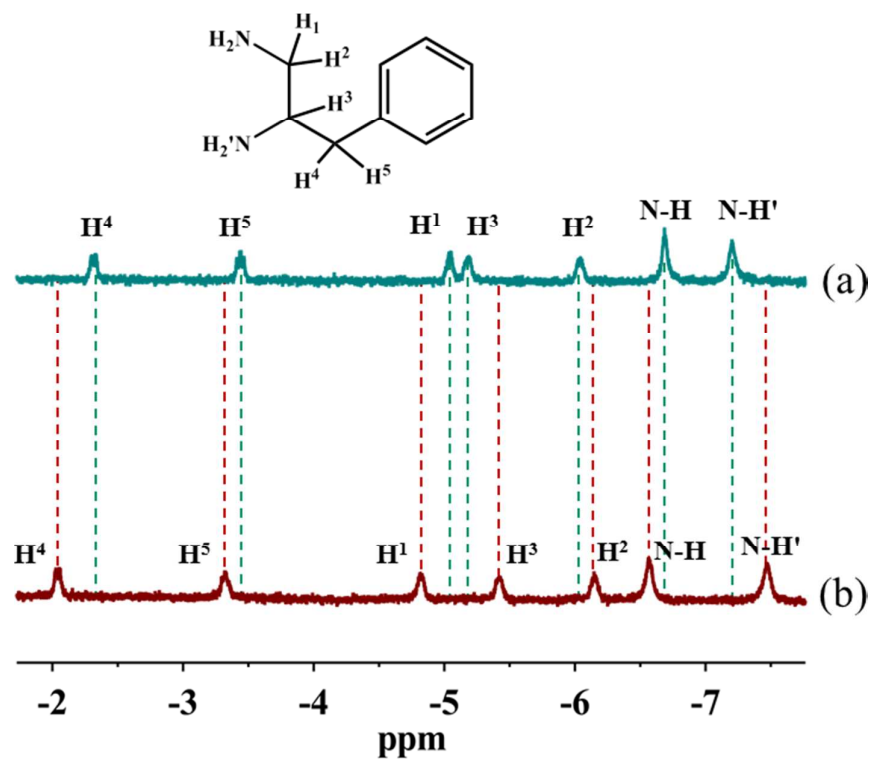

**FigureS 18.** Selected region of 400 MHz <sup>1</sup>H NMR spectra in the presence of (*S*)-H1 (0.75 mM) in CDCl<sub>3</sub> at 293K: (a) (*S*)-PPDA (0.75 equiv); (b) (*R*)-PPDA (0.75 equiv).

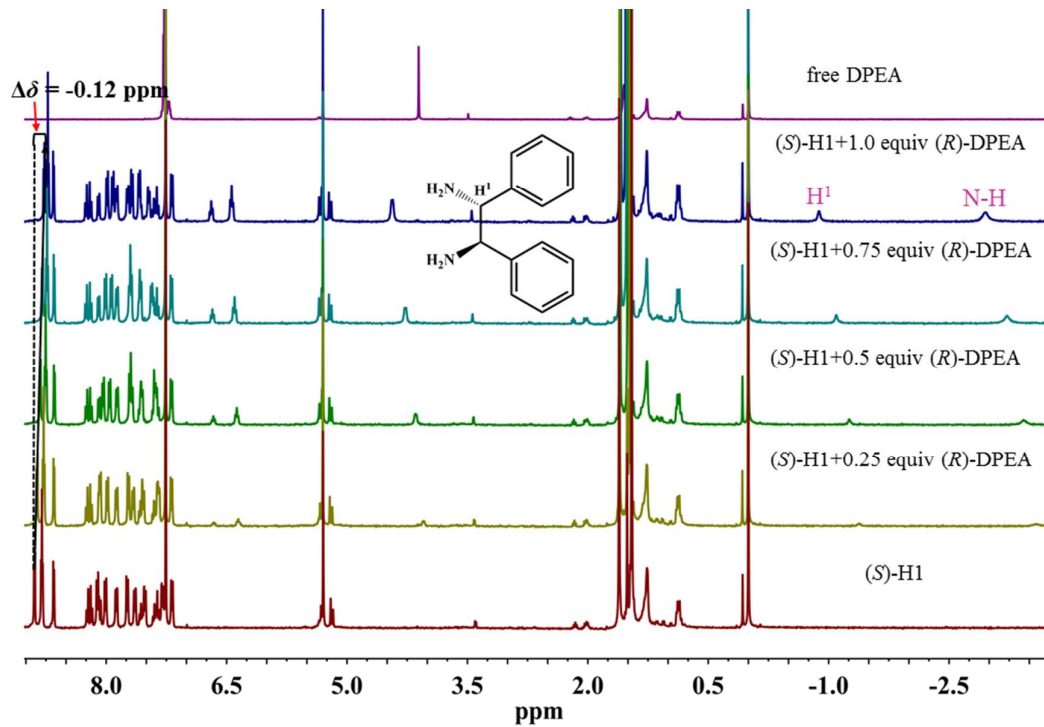

**Figure S19.**  $^1\text{H}$  NMR titration spectra of  $(S)\text{-H1}$  (0.75 mM) with  $(R)\text{-DPEA}$  (0.0-1.0 equiv, 0.25 equiv additions) at 298 K in  $\text{CDCl}_3$ .



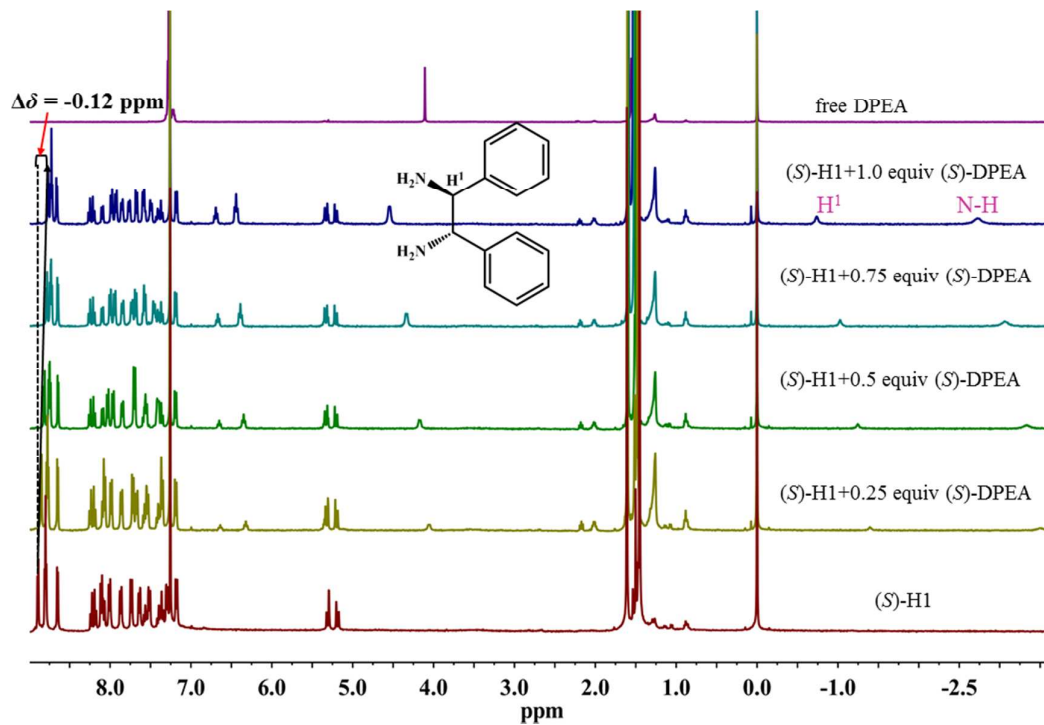

**Figure S20.**  $^1\text{H}$  NMR titration spectra of (S)-**H1** (0.75 mM) with (S)-DPEA (0.0-1.0 equiv, 0.25 equiv additions) at 298 K in  $\text{CDCl}_3$ .

**Table S1.** CD data of (*S*)-**H1** with chiral 1,2-diamines.<sup>a</sup>

| Compounds                                                 | $\lambda$ ( $\Delta\epsilon$ ) nm(mol <sup>-1</sup> ·L·cm <sup>-1</sup> ) |            | $A_{CD}$<br>(mol <sup>-1</sup> ·L·cm <sup>-1</sup> ) |
|-----------------------------------------------------------|---------------------------------------------------------------------------|------------|------------------------------------------------------|
|                                                           | 1st                                                                       | 2nd        |                                                      |
| ( <i>S</i> )- <b>H1</b>                                   | 430 (+200)                                                                | 420 (-202) | 402                                                  |
| ( <i>S</i> )- <b>H1</b> ⊃( <i>R</i> )-DACH                | 443 (-387)                                                                | 428 (+349) | -736                                                 |
| ( <i>S</i> )- <b>H1</b> ⊃( <i>S</i> )-DACH                | 444 (+176)                                                                | 425 (-203) | 379                                                  |
| ( <i>S</i> )- <b>H1</b> ⊃( <i>R</i> )-PPDA                | 440 (-294)                                                                | 427 (+214) | -508                                                 |
| ( <i>S</i> )- <b>H1</b> ⊃( <i>S</i> )-PPDA                | 443 (+24)                                                                 | 423 (-52)  | 76                                                   |
| ( <i>S</i> )- <b>H1</b> @[( <i>R</i> )-DPEA] <sub>2</sub> | 436 (+106)                                                                | 423 (-107) | 213                                                  |
| ( <i>S</i> )- <b>H1</b> @[( <i>S</i> )-DPEA] <sub>2</sub> | 435 (+49)                                                                 | 421 (-94)  | 143                                                  |

<sup>a</sup> In 1.0×10<sup>-6</sup> M CHCl<sub>3</sub> solution at 298 K;  $\lambda$ : peak or trough wavelength in nm; molar extinction coefficients  $\Delta\epsilon = [\theta]/32982$ ; total amplitude  $A_{CD} = \Delta\epsilon_1 - \Delta\epsilon_2$  in mol<sup>-1</sup>·L·cm<sup>-1</sup>.

**Table S2.** Selected structural parameters from the DFT-optimized structures.<sup>a</sup>

| Compound                        | Torsion<br>angle $\Phi/^\circ$ | Interchromophoric<br>distance R /Å |
|---------------------------------|--------------------------------|------------------------------------|
| (S)-H1                          | + 21.22                        | 3.48                               |
| (S)-H1 $\supset$ (R)-DACH       | - 43.18                        | 5.42                               |
| (S)-H1 $\supset$ (S)-DACH       | + 42.49                        | 5.50                               |
| (S)-H1 $\supset$ (R)-PPDA       | - 31.73                        | 5.18                               |
| (S)-H1 $\supset$ (S)-PPDA       | + 50.52                        | 6.10                               |
| (S)-H1@[ (R)-DPEA] <sub>2</sub> | + 10.94                        | 4.69                               |
| (S)-H1@[ (S)-DPEA] <sub>2</sub> | + 23.45                        | 4.41                               |

<sup>a</sup>  $\Phi$  is the spatial angel of C15-C5-C5'-C15'; R is the Zn-Zn distance in Å.

**Table S3.** The  $^1\text{H}$  NMR chemical shift ( $\delta$ , ppm), complexation-induced shift (CIS,  $\Delta\delta$ , ppm) and chemical shift nonequivalence ( $\Delta\Delta\delta$ , ppm) values of free and bound (*R*)-/(*S*)-PPDA (0.56 mM) in the presence of (*S*)-**H1** (0.75 mM) in  $\text{CDCl}_3$  at 298 K.

| Proton               | Free ( <i>R</i> )-PPDA<br>$\delta$ | ( <i>S</i> )- <b>H1</b> ⊃( <i>R</i> )-PPDA<br>$\delta$ ( $\Delta\delta_1$ ) | ( <i>S</i> )- <b>H1</b> ⊃( <i>S</i> )-PPDA<br>$\delta$ ( $\Delta\delta_2$ ) | $\Delta\Delta\delta$ |
|----------------------|------------------------------------|-----------------------------------------------------------------------------|-----------------------------------------------------------------------------|----------------------|
| <b>N-H</b>           | 1.25                               | -6.65 (-7.90)                                                               | -6.56 (-7.81)                                                               | 0.09                 |
| <b>N-H'</b>          | 1.25                               | -7.17 (-8.42)                                                               | -7.47 (-8.72)                                                               | 0.30                 |
| <b>H<sup>1</sup></b> | 2.82                               | -5.01 (-7.83)                                                               | -4.81 (-7.63)                                                               | 0.20                 |
| <b>H<sup>2</sup></b> | 2.78                               | -6.00 (-8.78)                                                               | -6.14 (-8.92)                                                               | 0.14                 |
| <b>H<sup>3</sup></b> | 2.97                               | -5.15 (-8.12)                                                               | -5.41 (-8.38)                                                               | 0.26                 |
| <b>H<sup>4</sup></b> | 2.55                               | -2.29 (-4.84)                                                               | -2.03 (-4.58)                                                               | 0.26                 |
| <b>H<sup>5</sup></b> | 2.49                               | -3.41 (-5.90)                                                               | -3.31 (-5.80)                                                               | 0.10                 |

<sup>a</sup>  $\Delta\delta = \delta_{\text{bound}} - \delta_{\text{free}}$ ; <sup>b</sup>  $\Delta\Delta\delta = |\Delta\delta_1 - \Delta\delta_2|$ .

**Table S4.** The  $^1\text{H}$  NMR chemical shift ( $\delta$ , ppm) and complexation-induced shift (CIS,  $\Delta\delta$ , ppm) values of free and bound (*R*)-/(*S*)-PPDA (0.75 mM) in the presence of (*S*)-**H1** (0.75 mM) in  $\text{CDCl}_3$  at 298 K.

| Proton               | Free ( <i>R</i> )-DPEA<br>$\delta$ | Bound ( <i>R</i> )-DPEA<br>$\delta$ ( $\Delta\delta_1$ ) | Bound ( <i>S</i> )-DPEA<br>$\delta$ ( $\Delta\delta_2$ ) |
|----------------------|------------------------------------|----------------------------------------------------------|----------------------------------------------------------|
| <b>N-H</b>           | 1.55                               | -2.96 (-4.51)                                            | -2.73 (-4.28)                                            |
| <b>H<sup>1</sup></b> | 4.11                               | -0.88 (-4.99)                                            | -0.74 (-4.85)                                            |

<sup>a</sup>  $\Delta\delta = \delta_{\text{bound}} - \delta_{\text{free}}$ .

## Reference:

- [S1] Zhang, X. Y.; Li, Y.; Qi, D. D.; Jiang, J. J.; Yan, X. Z.; Bian, Y. Z. *J. Phys. Chem.B.*, **2010**, *114*, 13143-13151.
- [S2] Thordarson, P., Determining association constants from titration experiments in supramolecular chemistry. *Chem. Soc. Rev.* **2011**, *40*, (3), 1305-1323
- [S3] Frisch M., Trucks G., Schlegel H., Scuseria G., Robb M., Cheeseman J., et al. Gaussian 09, Revision D.01. Wallingford, CT: Gaussian Inc.; **2013**.
